# Supplementary material for: Complications With Demineralized Bone Matrix, Hydroxyapatite and Beta-Tricalcium Phosphate in Single and Two-Level Anterior Cervical Discectomy and Fusion Surgery
Source: PubMed Central journal article supplement — Global Spine J. 2024 Feb 29;14(2 Suppl):78–85. doi: 10.1177/21925682231157320 (PMC10913904; doi:10.1177/21925682231157320), 2024-02-29
Supplement: sj-pdf-1-gsj-10.1177_21925682231157320.pdf [file sj-pdf-1-gsj-10.1177_21925682231157320.pdf]

| <b>TABLE 1: PICO search strategy Table for the systematic review</b> |                                                                                                                                                                                                                                                                                                            |                                                                                                                                                                                                                                                                                                                                                                                                                                                                                                    |
|----------------------------------------------------------------------|------------------------------------------------------------------------------------------------------------------------------------------------------------------------------------------------------------------------------------------------------------------------------------------------------------|----------------------------------------------------------------------------------------------------------------------------------------------------------------------------------------------------------------------------------------------------------------------------------------------------------------------------------------------------------------------------------------------------------------------------------------------------------------------------------------------------|
| <b>Study Component</b>                                               | <b>Inclusion</b>                                                                                                                                                                                                                                                                                           | <b>Exclusion</b>                                                                                                                                                                                                                                                                                                                                                                                                                                                                                   |
| <b>Participants</b>                                                  | <ul style="list-style-type: none"> <li>• Adult patients (18 – 80 years old)</li> <li>• Patients with herniated or degenerative cervical neck discs</li> </ul>                                                                                                                                              | <ul style="list-style-type: none"> <li>• History of tumour</li> <li>• Infection</li> <li>• SCI</li> <li>• Trauma/Fracture</li> <li>• Skeletally immature patients</li> <li>• Scoliosis or cervical deformity</li> </ul>                                                                                                                                                                                                                                                                            |
| <b>Intervention</b>                                                  | 1 – 2 levels ACDF using osteobiologics other than BMP (DBM, HA, $\beta$ -TCP, ceramics)                                                                                                                                                                                                                    | <ul style="list-style-type: none"> <li>• Anterior and posterior cervical fusions</li> <li>• Anterior cervical corpectomy and fusion</li> </ul>                                                                                                                                                                                                                                                                                                                                                     |
| <b>Comparator(s)</b>                                                 | Compare according DBM, HA, $\beta$ -TCP<br><br>1 or 2 surgical levels                                                                                                                                                                                                                                      | Use of BMP                                                                                                                                                                                                                                                                                                                                                                                                                                                                                         |
| <b>Outcomes</b>                                                      | Complications                                                                                                                                                                                                                                                                                              | <ul style="list-style-type: none"> <li>• No complications reported</li> <li>• Reporting no complications</li> <li>• Cage subsidence</li> <li>• Donor site complications</li> </ul>                                                                                                                                                                                                                                                                                                                 |
| <b>Study Design</b>                                                  | RCTs, cohort studies, prospective or retrospective studies with $\geq 10$ patients per group                                                                                                                                                                                                               | <ul style="list-style-type: none"> <li>• In vitro studies, animal studies</li> <li>• Case reports</li> <li>• Comparative studies with <math>&lt; 10</math> patients per treatment group</li> </ul>                                                                                                                                                                                                                                                                                                 |
| <b>Publication</b>                                                   | Studies published in English in peer reviewed journals, publicly published HTAs or available FDA reports.<br><br>(Each publication with a full review should be indicated whether or not it is an industry supported study.)<br><br>Databases to be searched: PubMed, EMBASE, Cochrane, clinical trial.gov | <ul style="list-style-type: none"> <li>• Abstracts, editorials, letters</li> <li>• Duplicate publications of the same study which do not report on different outcomes</li> <li>• Single reports from multicentre trials</li> <li>• Studies reporting on the technical aspects of biologics use in fusion surgery</li> <li>• White papers</li> <li>• Narrative and systematic reviews</li> <li>• Articles identified as preliminary reports when results are published in later versions</li> </ul> |
| <b>Timing</b>                                                        | Published in 2000 or later                                                                                                                                                                                                                                                                                 |                                                                                                                                                                                                                                                                                                                                                                                                                                                                                                    |

Abbreviations: DBM: demineralized bone matrix; HA: hydroxyapatite;  $\beta$ -TCP:  $\beta$ -tricalcium-phosphate; BMP: Bone morphogenetic protein; ACDF: Anterior cervical discectomy and fusion; RCT: Randomized controlled trial; SCI: Spinal cord injury

**TABLE 2:** MINORS scores of the included observational studies.

| First author, year                    | MINORS score* |
|---------------------------------------|---------------|
| Agrillo U et al. <sup>7</sup> , 2002  | 12 / 16       |
| Cauthen JC et al. <sup>8</sup> , 2003 | 18 / 24       |
| Cosar M et al. <sup>9</sup> , 2008    | 11 / 16       |
| Akula M et al. <sup>10</sup> , 2008   | 10 / 16       |
| Moon HJ et al. <sup>11</sup> , 2010   | 8 / 16        |
| Niu CC et al. <sup>12</sup> , 2010    | 21 / 24       |
| Zagra A et al. <sup>13</sup> , 2013   | 15 / 24       |
| Shin JS et al. <sup>15</sup> , 2014   | 17 / 24       |
| Kim SJ et al. <sup>16</sup> , 2014    | 20 / 24       |
| Chin K et al. <sup>19</sup> , 2017    | 20 / 24       |
| Yu J et al. <sup>21</sup> , 2017      | 18 / 24       |
| Shiban E et al. <sup>22</sup> , 2018  | 11 / 16       |

(\*) MINORS maximum score 16 points for non-comparative studies and 24 for comparative studies.

**TABLE 3:** Surgical data and outcomes of the included studies.

| First author/year                | Year | Treatment                                                                                              | Plating (Yes / No) | Osteobiologic used               | Follow-up (months)                                 | Fusion rate (12 months)                               |
|----------------------------------|------|--------------------------------------------------------------------------------------------------------|--------------------|----------------------------------|----------------------------------------------------|-------------------------------------------------------|
| Hacker RJ et al. <sup>6</sup>    | 2000 | Titanium alloy BAK/C (N=179)<br>HA-coated BAK/C (N=167)<br>Tricortical iliac bone or allograft (N=142) | No<br>No<br>No     | ABG<br>ABG, HA<br>ABG, allograft | 24                                                 | 97.1% / 72.7% ∞<br>98.9% / 87.5% ∞<br>89.7% / 83.3% ∞ |
| Agrillo U et al. <sup>7</sup>    | 2002 | Carbon fiber cage (N=45)                                                                               | No                 | HA                               | 22.3 (14 – 38)                                     | 100%                                                  |
| Cauthen JC et al. <sup>8</sup>   | 2003 | Cage (N=30)<br>Dowel (N=32)<br>Dowel-plate (N=26)                                                      | No<br>No<br>Yes    | ABG,<br>Allograft, DBM           | 24 (12 – 66)                                       | 97%<br>84%<br>85%                                     |
| Cosar M et al. <sup>9</sup>      | 2008 | β-TCP/HA ceramic graft (N=17)                                                                          | No                 | β-TCP/HA                         | 20 (18 – 24)                                       | NR                                                    |
| Akula M et al. <sup>10</sup>     | 2008 | Titanium plate cage (N=50)                                                                             | Yes                | ABG, HA                          | 24 (9 – 62)                                        | NR                                                    |
| Moon HJ et al. <sup>11</sup>     | 2010 | PEEK cage (N=27)                                                                                       | No                 | DBM                              | 25.5 (13 – 60)                                     | 88.9%                                                 |
| Niu CC et al. <sup>12</sup>      | 2010 | Titanium cage (N=28)<br>PEEK cage (N=25)                                                               | No<br>No           | β-TCP<br>Allograft               | 31.9 ± 3.4<br>30.4 ± 3.3                           | 86.5%<br>100%                                         |
| Zagra A et al. <sup>13</sup>     | 2013 | Tricortical iliac bone (N=24)<br>Titanium cage (N=29)<br>PEEK cage (N=33)                              | Yes<br>No<br>No    | ABG<br>ABG<br>β-TCP              | 84 (60 – 144)                                      | 100%<br>100%<br>100%                                  |
| Kim CH et al. <sup>14</sup>      | 2013 | PEEK cage (N=29)<br>Tricortical iliac crest bone (N=23)                                                | No<br>Yes          | HA + BMA<br>ABG                  | 31 ± 17 (12 – 63)                                  | 76% (6 months)<br>92% (6 months)                      |
| Shin JS et al. <sup>15</sup>     | 2014 | Zero-profile device (N=20)<br>PEEK cage (N=20)<br>Tricortical iliac bone (N=20)                        | No<br>No<br>Yes    | DBM<br>DBM<br>ABG                | 13.2 ± 1.0<br>13.1 ± 1.2<br>13.7 ± 1.1             | NR<br>NR<br>NR                                        |
| Kim SJ et al. <sup>16</sup>      | 2014 | Double cylindrical cage (N=48)<br>Tricortical iliac bone (N=48)                                        | No<br>Yes          | ABG + DBM<br>ABG                 | 12                                                 | 97.9%<br>97.9%                                        |
| Xie Y et al. <sup>17</sup>       | 2015 | PEEK cage (N=35)<br>PEEK cage (N=33)                                                                   | Yes<br>Yes         | CS/DBM<br>ABG (iliac)            | 24                                                 | 94.3%<br>100%                                         |
| Yi J et al. <sup>18</sup>        | 2015 | PEEK cage (N=38)<br>PEEK cage (N=39)                                                                   | Yes<br>Yes         | HA + DBM<br>HA + β-TCP           | 12                                                 | 87% / 87%*<br>87% / 72%*                              |
| Chin K et al. <sup>19</sup>      | 2017 | PEEK cage outpatient (N=75)<br>PEEK cage inpatient (N=70)                                              | Yes<br>Yes         | DBM<br>DBM                       | 24                                                 | NR<br>NR                                              |
| Farrokhi MR et al. <sup>20</sup> | 2017 | Acrylic cage (N=32)<br>PEEK cage (N=32)                                                                | No<br>No           | β-TCP<br>β-TCP                   | 12                                                 | 96.9%<br>93.8%                                        |
| Yu J et al. <sup>21</sup>        | 2017 | PEEK cage (N=37)<br>PEEK cage (N=31)<br>Tricortical iliac bone (N= 47)                                 | No<br>Yes<br>Yes   | DBM<br>DBM<br>ABG                | 36.9 (24 – 67)<br>39.1 (24 – 65)<br>38.5 (24 – 60) | 97.4%<br>96.3%<br>97.8%                               |
| Shiban E et al. <sup>22</sup>    | 2018 | PEEK cages (N=194)                                                                                     | No                 | DBM                              | 36 (12 – 56)                                       | 79% single level<br>82% two levels                    |
